# Supplementary material for: Human serum from SARS-CoV-2 vaccinated and COVID-19 patients shows reduced binding to the RBD of SARS-CoV-2 Omicron variant
Source: bioRxiv or medRxiv preprint supplement (doi:10.1101/2021.12.10.21267523), 2022-01-01

**Supplementary Figure 1: SDS-PAGE of the RBD25 variants.** 2  $\mu$ g of the indicated purified RBD25 variant in Laemmli buffer containing 5 % beta-mercaptoethanol were heated to 95°C for 10 min and run on 15% SDS-PAGE.

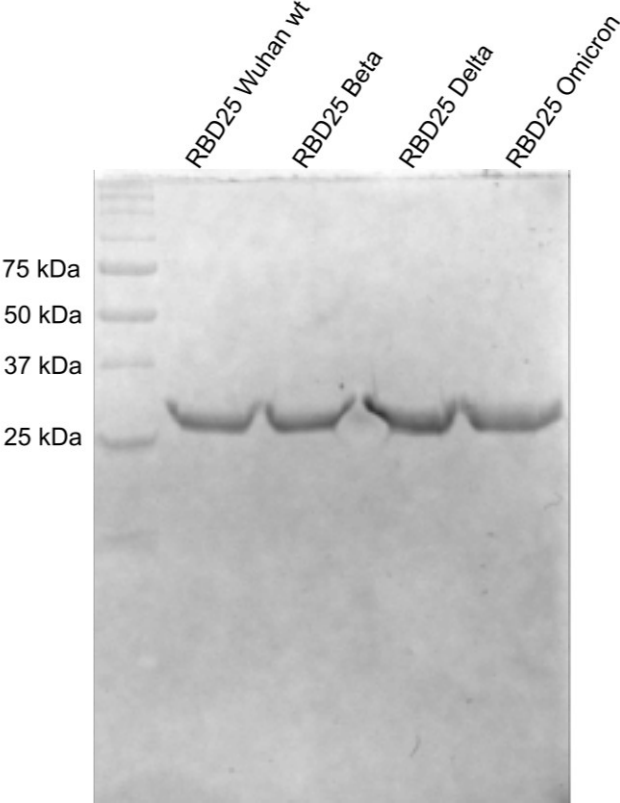

Supplement: Supplementary file [file media-1.pdf]
